# Supplementary material for: The bile acid metabolome in umbilical cord blood and meconium of healthy newborns: distinct characteristics and implications
Source: PeerJ. 2024 Dec 13;12:e18506. doi: 10.7717/peerj.18506 (PMC11648689; doi:10.7717/peerj.18506)
Supplement: Supplemental Information 1 [file peerj-12-18506-s001.xlsx]

## Sheet: 脐血胆汁酸谱（更正后）
Specimen No.	CA	TCA	GCA	CDCA	TCDCA	GCDCA	GCDCA-3S	GCDCA-3Glu	βCA	NorCA	DCA	DCA-3S	GDCA-3Glu	LCA	TLCA	LCA-3S	6-KetoLCA	7-KetoLCA	7,12-DiketoLCA	12-DHCA	3-DHCA	βUDCA	UDCA	GUDCA	TαMCA	HCA	THCA	GHCA	THDCA	GHDCA
N5	5.4805	115.99	23.9397	38.7037	1530.07	488.647	25.2187	7.9386	9.9619	4.5369	4.487	0.7131	0.9837	2.7817	0.6945	0.1253	1.5122	2.7423	0.498	3.995	36.4897	7.6791	36.8658	2.4998	3.8027	62.4218	84.1647	23.5816	17.1369	4.7777
N6	43.622	745.448	441.078	11.2202	1190.83	479.359	53.6525	4.3467	73.1145	9.9451	18.8141	10.7443	2.9129	2.5863	0.9557	0.4751	1.4139	1.3021	1.0992	6.111	178.745	3.4113	4.8282	2.0924	27.9808	71.3315	239.225	93.6132	81.1246	20.8477
N7	16.9758	665.152	145.917	12.5276	612.876	500.538	38.114	8.0649	39.0049	10.6632	7.572	2.5496	3.2992	2.6616	0.9559	0.4346	0.8433	0.69	0.4549	6.9053	212.471	1.8241	3.4443	0.276	101.583	94.9471	114.445	81.3627	88.0955	15.3057
N8	35.9879	866.808	229.334	13.6503	1163.68	616.101	19.2767	6.2266	58.4208	11.0239	11.6553	2.6087	2.9761	3.01	0.7782	0.3339	1.228	1.2229	4.1331	9.8626	304.111	3.0866	1.7166	0.8891	28.3535	60.264	154.224	58.4891	64.6195	23.2422
N9	9.6311	491.036	264.103	10.9467	338.339	186.296	10.3916	3.9811	14.0272	6.5932	17.7074	7.8508	2.693	1.1174	0.4303	0.1735	0.5118	0.6681	1.0041	4.7086	101.305	1.6366	1.4123	0.1234	30.8535	74.5723	441.413	109.446	67.47	10.3908
N10	51.6669	531.039	416.356	11.3031	611.363	395.538	47.0619	9.8726	50.1062	11.7749	8.2737	16.4901	4.6148	2.569	0.5425	0.5424	0.6782	0.7075	0.5591	10.2118	221.671	1.1196	1.8172	0.3292	26.4159	83.369	287.234	131.62	52.5052	16.3721
N60	167.496	1446.41	2510.19	17.2022	1783.91	3444.51	56.3097	4.7213	19.5394	6.9832	24.9022	4.8495	4.2113	3.0154	1.1137	0.4192	6.0105	4.4866	4.3277	7.131	114.251	25.1107	107.821	143.149	55.3986	48.7197	94.2839	153.834	33.365	29.2718
N61	23.0175	350.028	148.964	14.3565	697.899	449.588	32.7857	7.0394	36.4411	6.6699	8.0118	5.5626	2.6291	2.7401	0.4598	0.1198	0.9899	0.9204	1.0176	7.8503	186.487	16.8683	30.8201	11.3496	13.0797	54.9518	141.767	75.6113	32.7406	18.4054
N62	41.2442	608.397	262.117	12.0361	373.689	196.781	11.4377	2.3296	23.2687	16.83	30.5091	21.7501	2.1839	4.7731	1.0163	0.5999	1.2537	1.4803	1.492	9.187	145.754	2.67	16.5947	1.5035	63.1291	35.3001	128.268	49.6896	27.077	14.9806
N63	17.5085	124.932	148.937	12.5243	445.306	537.431	46.8666	2.7208	34.5857	11.8112	8.4087	6.3712	2.578	1.5289	0.5837	0.2092	1.2361	0.7676	3.1067	5.0571	109.633	2.5553	4.7203	2.2986	10.5384	46.5621	88.2563	60.241	19.741	19.5613
N64	19.4592	102.91	56.5443	6.8079	469.077	330.246	17.5889	6.7008	10.7011	6.7606	9.8223	7.3975	7.474	3.1472	0.5311	0.6152	0.8815	1.067	1.7897	5.4182	73.1687	0.8215	0.7294	0.8236	12.1014	28.5878	135.315	49.6334	38.8619	10.2243
N65	17.5518	226.256	226.638	40.4415	2447.85	1127.16	60.2361	2.0607	16.4951	14.2277	14.6477	2.1739	1.2411	2.359	1.5082	0.315	1.4753	2.6564	0.7955	4.8723	58.7133	9.8991	20.6822	8.4165	26.5829	118.506	215.628	108.968	72.6277	24.3721
N66	2.1537	520.385	156.342	8.6305	2173.8	1523.87	40.5898	15.6861	2.106	16.1229	12.0021	10.4524	19.3034	1.988	1.5243	0.444	0.7784	0.8913	1.7169	3.5647	19.9416	2.6212	2.5526	6.1614	33.5199	29.9038	223.532	97.222	65.5687	28.7267
N67	56.8347	445.916	190.797	21.9063	665.889	402.066	14.604	4.7889	4.6949	13.365	49.4911	13.7656	4.9228	3.5925	0.3584	0.4679	1.0077	1.0405	1.6652	5.3221	46.3717	0.8071	7.9819	1.0333	74.9753	85.5097	270.204	109.443	61.8266	14.3379
N3	21.03	309.433	208.161	16.2155	1411.7	850.07	49.74	8.2945	16.606	9.4527	4.3071	0.096	2.4379	2.69	0.9912	0.1706	2.2808	2.3477	3.5866	4.6023	49.1938	9.3731	17.9647	7.3679	15.3988	62.9528	571.154	201.907	81.1418	22.4419
