# Supplementary material for: The bile acid metabolome in umbilical cord blood and meconium of healthy newborns: distinct characteristics and implications
Source: PeerJ. 2024 Dec 13;12:e18506. doi: 10.7717/peerj.18506 (PMC11648689; doi:10.7717/peerj.18506)
Supplement: Supplemental Information 2 [file peerj-12-18506-s002.xlsx]

## Sheet: 胎粪胆汁酸整理后
Specimen No.	CA	TCA	GCA	CDCA	TCDCA	GCDCA	LCA	isoalloLCA	isoLCA	TLCA	LCA-3S	7-KetoLCA	12-KetoLCA	GLCA-3S	DCA	TDCA	GDCA	DCA-3S	TωMCA	TαMCA	αMCA	βMCA	HCA	THCA	GHCA	HDCA	GHDCA	βHDCA	THDCA	7-DHCA	12-DHCA	3-DHCA	TUDCA	GUDCA	UDCA-7S
N3	2.2986	446.62	205.918	0.1807	807.862	9.4978	0.0248	0.0606	0.0529	0.3017	14.5503	0.036	0.0504	347.59	0.1445	4.1266	2.7429	163.352	289.183	229.345	0.1967	0.4199	1.5149	2160.06	157.527	0.1745	6.7665	0.0562	587.058	0.00359	0.00242	0.0014	2.9416	1.5744	25.6637
N5	6.2664	2767.65	489.508	0.5165	3562.88	100.891	0.0217	0.0701	0.0349	0.1109	2.9275	0.0358	0.0335	42.7133	0.0501	2.3703	0.2045	9.5592	752.366	156.706	0.8848	1.2099	1.4135	3833.72	339.566	0.1211	8.8418	0.00137	864.588	0.0621	0.0826	0.1817	25.9481	5.0909	7.985
N6	4.3659	1233.17	423.875	0.281	535.168	9.719	0.0408	0.0643	0.0202	0.1504	5.0517	0.0356	0.0598	88.1094	0.1454	2.9639	2.3271	84.9574	175.657	191.812	0.4575	0.8781	0.996	1230.56	92.5207	0.9657	3.312	0.0937	321.292	0.0764	0.1035	0.237	1.366	0.2839	19.2889
N7	0.3877	1051.65	299.688	0.1241	478.467	8.2156	0.0241	0.0853	0.0403	0.0851	4.097	0.0285	0.0462	116.404	0.1238	1.5699	0.5579	21.6119	227.002	80.3578	0.6146	1.1634	0.6889	1810.95	170.822	0.3904	5.247	0.00137	285.27	0.0519	0.00242	0.1054	1.9835	0.3211	18.5191
N8	4.4908	4547.86	702.36	0.2621	2368.51	9.2276	0.0311	0.0598	0.0606	0.3941	6.9388	0.0269	0.07	139.054	0.1065	15.8584	0.5345	61.2346	529.317	316.709	1.9782	1.8315	0.4668	2702.38	117.445	0.4593	3.2898	0.0464	892.422	0.3699	0.1166	0.1619	5.3929	0.3086	25.9139
N9	1.3338	241.704	99.4851	0.1578	154.692	5.9021	0.2136	0.0929	0.0854	0.1798	4.9978	0.0347	0.0902	127.329	0.7722	2.9133	4.1092	86.8845	179.716	205.186	0.4581	1.4056	1.5882	1192.24	110.316	1.1025	5.5811	0.1389	230.269	0.1396	0.0284	0.0158	1.2252	0.02441	21.8515
N10	12.7683	1628.03	787.797	0.8537	1473.13	87.4773	0.0262	0.00454	0.0285	0.2417	0.4959	0.056	0.0399	9.1787	0.1353	1.7952	1.5403	6.429	117.991	39.4677	0.8312	1.5242	0.787	815.423	98.7794	0.3957	2.6187	0.0242	225.2	0.0435	0.0847	0.1946	3.156	1.059	2.2712
N60	58.8958	9398.23	9185.5	0.3088	3012.93	400.372	0.0379	0.00454	0.0379	0.9008	7.2188	0.0418	0.0671	288.166	0.1205	98.9723	19.4976	65.2722	378.781	642.56	0.3285	0.3452	0.3228	1167.32	333.083	0.3722	14.3769	0.0422	616.538	0.0868	0.0588	0.7083	247.414	147.418	18.6274
N61	3.8188	763.35	301.674	0.3846	986.061	79.7734	0.0226	0.0529	0.0277	0.2276	1.7319	0.0287	0.0283	59.6001	0.1164	4.088	2.6638	25.7362	183.999	180.256	1.3901	2.5034	0.5537	1353.19	121.134	0.232	7.8383	0.00137	354.267	0.2568	0.0976	0.0485	10.6611	11.9206	7.6101
N62	0.9888	160.564	39.4116	0.1253	83.9135	0.4796	0.0191	0.00454	0.0525	0.0742	8.7369	0.0351	0.0402	176.923	0.1	1.8494	0.2159	209.432	107.276	107.607	1.4564	1.6876	0.3566	569.351	24.2538	0.3333	1.6935	0.0503	109.588	0.3165	0.0604	0.014	1.6086	0.3839	40.816
N63	195.569	2350.34	1302.63	42.6831	1114.1	59.6971	0.0363	0.0517	0.0333	0.271	16.3232	0.7016	0.2485	151.959	2.066	5.4892	7.2173	190.944	299.023	309.947	0.6573	2.2149	7.3029	1522.1	259.288	2.3271	13.7118	0.0406	316.363	0.5948	3.5683	2.892	3.9377	3.5325	38.1934
N64	14.4632	1683.63	443.249	0.4203	1442.79	31.1628	0.0311	0.0544	0.0416	0.4055	9.463	0.0638	0.0585	202.877	0.2301	12.3169	4.714	71.4274	254.223	177.986	0.6122	1.1821	2.1372	1551.19	134.796	0.4144	10.4779	0.071	624.529	0.2432	0.0325	0.255	3.5724	0.902	29.4737
N65	1.0699	325.969	170.053	0.2399	209.402	4.5521	0.025	0.00454	0.0733	0.0753	3.9461	0.0198	0.0341	195.763	0.0554	0.6227	0.1294	17.4091	202.821	144.583	1.076	2.526	0.4351	1287.95	85.8667	0.1319	1.1502	0.0241	286.574	0.0983	0.0899	0.0771	1.4665	0.353	11.3309
N66	0.8933	1760.09	262.486	0.1631	1487.6	22.7599	0.0212	0.00454	0.0254	0.1125	4.9731	0.0222	0.0242	290.221	0.027	8.1197	2.0772	40.1815	308.896	217.458	0.0912	0.1645	0.2914	1968.24	92.3454	0.0909	6.45	0.00137	569.143	0.00359	0.00242	0.0349	10.3891	1.834	7.3453
N67	5.3358	1702.99	463.185	0.0807	651.692	2.0979	0.0309	0.00454	0.0795	0.0824	6.6625	0.036	0.0339	150.696	0.1273	5.5306	0.8145	113.247	578.951	682.74	0.033	0.1474	1.2571	2474.38	205.66	0.4611	2.9265	0.1096	521.866	0.0469	0.0405	0.0141	4.0698	0.2808	43.648
